# Supplementary material
Source: ML conference proceedings conference paper supplement (https://openreview.net/forum?id=wJaCsnT9UE)

# Ensemble OOD Acc

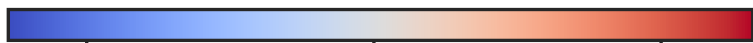

75.5 76.5 77.5

Diversity

6

4

2

0.2

0.4

0.6

Sharpness

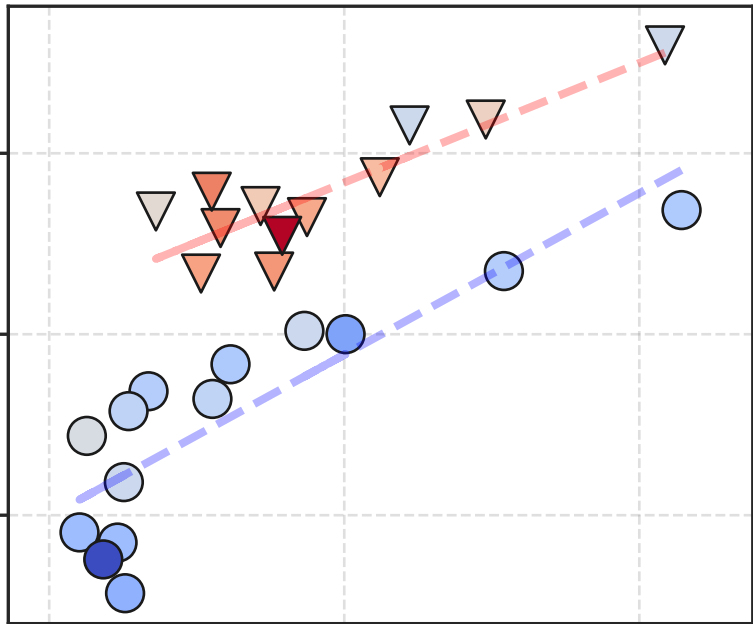

Supplement: supplementary_material [file attachment]

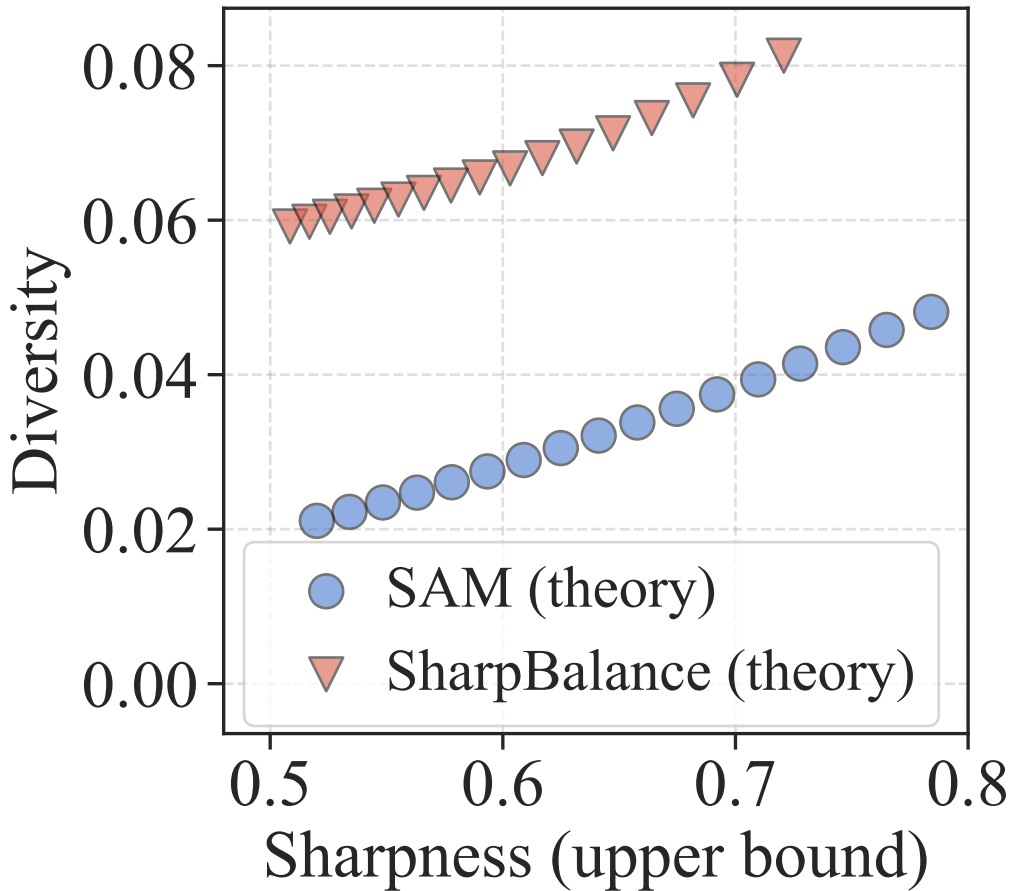

Supplement: supplementary_material [file attachment]
